# Supplementary material for: Arc volcanism, carbonate platform evolution and palaeo-atmospheric CO 2 : Components and interactions in the deep carbon cycle
Source: Copernicus journal article supplement (doi:10.5194/cp-2017-112), 2017-09-19
Supplement: Supplementary file [file cp-2017-112-AC2-supplement.pdf]

## Author's Response to Anonymous Referee #1

Manuscript Number: cp-2017-112

- 5 Manuscript Title: Arc volcanism, carbonate platform evolution and palaeo-atmospheric CO<sub>2</sub>:  
Components and interactions in the deep carbon cycle

### General Comments by Anonymous Referee #1:

10 This is a clear, well-written analysis of an important problem in paleoclimate: what is the connection  
between tectonic activity and the carbon cycle/climate? The hypothesis is clearly stated and the use of  
plate reconstructions for the analysis is a useful and appropriate way to approach the problem.

The wavelet analysis appears to be rigorous. However, I wonder why this method was chosen rather  
than, for example, a simpler autocorrelation? Autocorrelation would appear to address the same  
hypothesis without assuming periodic behavior.

15

**Authors' response:** *Autocorrelation calculates the correlation of a signal with a delayed copy of  
itself. In other words, it analyses periodicity in signals in a single time series and cannot be applied to  
compare two time series like those in our study. The equivalent of autocorrelation for two time series  
is cross-correlation, which is the time-domain equivalent of cross-spectral analysis in the Fourier  
20 domain. However, neither cross-spectral correlation nor cross-correlation can characterise  
correlation as a function of time or scale, unlike in wavelet analysis. Wavelet analysis, which is  
similar to cross-spectral correlation, is fundamentally different as it does not use sine or cosine waves  
to characterise a signal, but (as in our case) Morlet wavelets. It then deconvolves the signal into  
constituent Morlet wavelets to attempt to find similarities between two time series, irrespective of  
25 whether periodicities exist in signals. In this way, wavelet transforms are not only used for detecting  
periodicities in signals but to detect any time- or space-dependent correlations in signals. For clarity,  
justification of the wavelet analysis method were added on pg. 3, line 17-24 and pg. 4, line 4-6.*

30 In fact, the existence of periodic signals on the order of 10s of millions of years is very surprising – if  
those signals are real and significant, then the authors should explore possible mechanisms for  
generating such periodic changes in CO<sub>2</sub> and/or arc activity (e.g. around pg 9, Line 17-18 and pg 11,  
section 4.1).

35 *The referee is correct. However, in our analysis there were no periodicities < ~32 Myr that were  
found to be significant and meaningful. Instead, only short-term in-phase behaviour has been  
investigated in the discussion which links a peak in carbonate-intersecting arc (CIA) lengths to a  
peak in palaeo-atmospheric CO<sub>2</sub>. In agreement with the referee's comments, the possible  
mechanisms for arc-related periodicities have been indicated in the introduction (see pg. 3, line 12-  
40 15), however the authors believe that further explanation of the mechanisms is not warranted given  
the results, and is beyond the scope of the paper.*

It is not clear to me how or why periodic signals should appear from tectonic interactions with carbonate platform. Without a proposed mechanism, perhaps the signals are simply noise in the data?

5 *Following on from response #1, wavelet analysis was applied to find regions of correlation and not necessarily periodicities. However, it can be applied to uncover periodicities if there are any. Hence, the objective of this paper is to find correlations and periodicities that have not yet been explored. Lee et al. (2013) identified the possibility of periodicity which is a key assumption in the paper. Inclusion of this assumption has been added to the Introduction on pg. 3 line 14-17. Patterns of CO<sub>2</sub> storage occur when island arcs dominate continental arcs and CO<sub>2</sub> liberation when continental arcs dominate, which are linked to the periodic assembly and dispersal of continents. Earlier work by Lendardic et al. (2011) propose a mantle thermal mixing mechanism to explain supercontinent cycles that alter the nature of subductions in ways that effect CO<sub>2</sub> release. Our investigation assumed that mechanisms such as those explored by Lenardic et al. (2011) and Lenardic (2016) and hypothesised by Lee et al. (2013) exist and cause periodic linked behaviour between arc activity and atmospheric CO<sub>2</sub>. However, we do not focus on the mechanisms as it would be beyond the scope of the paper.*

*Secondly, the use of the cross-wavelet spectrum with wavelet coherence is applied to make sure that signals found in the data are real and significantly different from simple noise.*

20 I also find it very surprising that arcs interacting with carbonate platforms seem to have increased 5-fold (as shown in Fig. 4) from 250 to 50 Ma. Is this result perhaps an artifact of only mapping out Phanerozoic platforms from the Kiessling 2003 database?

25 *The result the referee highlights is because an Accumulation Model of carbonate platforms was used which assumes that crustal carbonate reservoirs grow in thickness and spatial extent through time. Unless there is a dramatic change in arc regimes (i.e. from continental to intraoceanic), CIA lengths will only increase. The limitations of this assumption are discussed in section 2.2.*

30 Why are Precambrian platform areas not included? There are many examples of known, extensive Precambrian carbonate platforms, and I suspect that adding them to the analysis would remove a significant portion of this signal<sup>5</sup>. It seems unlikely that such a major change in magnitude could occur based on tectonic interaction with a depositional environment known to have existed since the Archean. If this result is robust, then the authors should advance some possibilities for why this dramatic change  
35 occurred.

40 *It is true that the Kiessling et al. (2003) compilation of global, palaeo-distribution of carbonate platform maps extend to the Ordovician, however incorporating these now would require an extensive amount of work. The reason why no platforms earlier than the Devonian were mapped was because initially an 'Accumulation Model' and an 'Active Carbonate Platform Model' were tested*

and compared. The Active Carbonate Platform model assumed that crustal carbonate reservoirs could be depleted over tens of millions of years, and entailed that platform existed within certain windows. For the results to be comparable, carbonate platform evolution started at the same time. Given that our plate model only records plate motions from 410 Ma, both models were only implemented from the Devonian. However, modelling carbonate platforms from the earliest Phanerozoic and Precambrian is part of future work.

In any case, the Cone of Influence (COI) means that the earliest and latest part of the time series are affected by distortion, such that our wavelet analysis excludes characterising the Devonian (and late Cretaceous to present day). As such, we believe that adding the Ordovician and Silurian platforms would not significantly impact wavelet analysis, which is the focus of our study.

If the above comments can be addressed, this study demonstrates a useful application of global plate reconstructions for examining Earth system behavior over the last ~400 Myr.

### 15 **Specific Comments by Anonymous Referee #1:**

One aspect of the analysis was unclear to me: are the locations of past arcs mapped out in ancient plate reconstructions? This was the impression I received from the description of the plate reconstruction model, the mapping of carbonate platforms, and Fig. 5. However, this impression seemed to be contradicted by Fig. 4 caption and pg 4, lines 6-8, which describe using subduction zone lengths as a surrogate for volcanic arc lengths. Why is the latter necessary if the arcs and plate boundaries can be accurately mapped out? I hope the authors can clarify their methods.

We can only map out plate boundaries and, hence, subduction zone lengths using our analysis. This is why we used subduction zones as a surrogate for continental arc lengths. However, to avoid confusion, adjustments have been made in Section 2.3 (pg. 7, line 27; pg. 8 line 1) and Section 2.4 (pg. 8, line 10) and the caption of Figure 4 (pg. 16).

Fig 2/3: If filtering has removed any signal < ~5Myr, that portion of the results should be removed (or at least indicated).

Results referring to short wavelength (<5 Myr) periodicity have been removed from: pg. 13, line 4-5; pg. 14, line 17-18; pg. 15, line 17-18; and pg. 16, line 1.

Perhaps refer to Figure S1 (showing proxy CO<sub>2</sub> data) when those data are mentioned (pg 9, line 24 and pg 10, line 10).

The referee's suggestion has been implemented with corrections on pg. 9, line 22 and pg. 10, line 12.

Additionally - how is noise/uncertainty in the proxy data accounted for? How is the sparseness of data older than 220 Ma addressed?

5 *Noise and uncertainty in the proxy data cannot be accounted for using our approach, nor can our plate model, as one working hypothesis, account for uncertainty. However the authors recognise the importance of quantifying error and uncertainty, and have highlighted this as an area of future work. A paragraph that addresses error quantification has been added to the discussion (pg. 24, line 8-15).*

Technical corrections: Pg 7, line 11: ‘temporally limited to the Devonian’ is unclear (it sounds like only the Devonian is being analyzed). Consider specifying that the maximum time considered in the analysis is the Devonian<sup>10</sup>.

10

*‘Temporally limited to the Devonian’ was changed to ‘in the Phanerozoic from the Devonian to present day’ on pg. 7, line 10.*

15 Pg 9, line 4: wording is awkward: ‘corresponds to an upper limit by which carbonate platforms can interact...’ consider changing ‘by which’ to ‘for interactions of carbonate platforms...’

*The referee’s suggestion to change ‘by which’ to ‘for interactions of carbonate platforms...’ was accepted on pg. 8, line 27; pg. 9, line 1.*

20 Pg 10, line 22: Wording: ‘modelled data’ is unclear<sup>12</sup>.

*‘Modelled data’ was changed to ‘estimates from the Accumulation model’ on pg. 10, line 21.*

## 25 **Author comments:**

Additional corrections were made in the text, which are described below:

- The colour of the subduction zone in Figure 1 has been updated to reflect actual colours of the figure, and text has been updated on the figure.
  - ‘One-to-one’ changed to general on pg. 4, line 18.
  - ‘Continuously’ removed from pg. 5, line 5.
  - ‘Colors’ changed to ‘colours’ for consistency with British English in Figure 2.
  - A short paragraph was moved based on order of figures (pg. 11, line 19-21).
  - Text has been removed that is not considered to add anything to analysis from pg. 11, line 10-12 and pg. 16, line 18-26.
  - ‘E.g.’ changed to ‘e.g. on pg. 25, line 5
- 30
- 35



# Arc volcanism, carbonate platform evolution and palaeo-atmospheric CO<sub>2</sub>: Components and interactions in the deep carbon cycle

Jodie Pall<sup>1</sup>, Sabin Zahirovic<sup>1</sup>, Sebastiano Doss<sup>1</sup>, Rakib Hassan<sup>1,2</sup>, Kara J. Matthews<sup>1,3</sup>, John Cannon<sup>1</sup>,  
5 Michael Gurnis<sup>4</sup>, Louis Moresi<sup>5</sup>, Adrian Lenardic<sup>6</sup> and R. Dietmar Müller<sup>1</sup>

<sup>1</sup>EarthByte Group, School of Geosciences, University of Sydney, NSW 2006, Australia.

<sup>2</sup>Geoscience Australia, GPO Box 378, Canberra 2601, ACT, Australia

<sup>3</sup>Department of Earth Sciences, University of Oxford, Oxford, OX1 3AN, UK.

<sup>4</sup>Seismological Laboratory, California Institute of Technology, California 91125, USA.

10 <sup>5</sup>School of Earth Sciences, University of Melbourne, Victoria 3010, Australia.

<sup>6</sup>Department of Earth Science, Rice University, Texas 77005, USA.

*Correspondence to:* Jodie Pall (jodierae.pall@gmail.com)

## Abstract

Carbon dioxide (CO<sub>2</sub>) liberated at arc volcanoes that intersect buried carbonate platforms plays a larger  
15 role in influencing atmospheric CO<sub>2</sub> than those active margins lacking buried carbonate platforms. This  
study investigates the contribution of carbonate-intersecting arc activity on palaeo-atmospheric CO<sub>2</sub>  
levels over the past 410 million years by integrating a plate motion model with an evolving carbonate  
platform development model. Our modelled subduction zone lengths and carbonate-intersecting arc  
lengths approximate arc activity with time, and can be used as input into fully-coupled models of CO<sub>2</sub>  
20 flux between deep and shallow reservoirs.

Continuous and cross-wavelet as well as wavelet coherence analyses were used to evaluate trends  
between carbonate-intersecting arc activity, non-carbonate-intersecting arc activity and total global  
subduction zone lengths and the proxy-CO<sub>2</sub> record between 410 Ma and the present. Wavelet analysis  
revealed significant linked periodic behaviour between 75-50 Ma, where global carbonate-intersecting  
25 arc activity is relatively high and where peaks in palaeo-atmospheric CO<sub>2</sub> is correlated with peaks in  
global carbonate-intersecting arc activity, characterised by a ~32 Myr periodicity and a 10 Myr lag of  
CO<sub>2</sub> peaks after carbonate-intersecting arc length peaks. The linked behaviour may suggest that the

relative abundance of carbonate-intersecting arcs played a role in affecting global climate during the Late Cretaceous to Early Paleogene greenhouse. At all other times, atmospheric CO<sub>2</sub> emissions from carbonate-intersecting arcs were not correlated with the proxy-CO<sub>2</sub> record. Our analysis did not support the idea that carbonate-intersecting arc activity is more important than non-carbonate intersecting arc activity in driving changes in palaeo-atmospheric CO<sub>2</sub> levels. This suggests that tectonic controls are more elaborate than the subduction-related volcanic emissions component or that other feedback mechanisms between the geosphere, atmosphere and biosphere played larger roles in modulating climate in the Phanerozoic.

## 1 Introduction

10 The current paradigm of the deep carbon cycle (i.e. the planetary cycling of carbon over million-year timescales) attributes fluctuations in the atmospheric carbon dioxide (CO<sub>2</sub>) to the realm of tectonic forces, where arc-volcanic emissions (van der Meer et al., 2014; Kerrick, 2001) and metamorphic decarbonation (Lee et al., 2013) are major CO<sub>2</sub> sources, and the processes of silicate weathering (Sundquist, 1991; Kent and Muttoni, 2008) and marine organic carbon burial (Bernier and Caldeira, 15 1997; Ridgwell and Zeebe, 2005) are major sinks removing CO<sub>2</sub> from the atmosphere. Subduction plays a critical role in this cycle. In a dynamic interplay, oceanic lithosphere is consumed at subduction zones, removing carbon bound in pelagic carbonate seafloor sediments from the exogenic carbon cycle. Simultaneously, CO<sub>2</sub> is emitted during arc volcanism and at mid-ocean ridges (MORs) where new oceanic crust is being created (Burton et al., 2013). Despite the proposal that silicate weathering has, at 20 some stages, been a dominating control of atmospheric CO<sub>2</sub> levels (Kump, 2000; Kent and Muttoni, 2013), arc magmatism at icehouse-greenhouse transitions is thought to be the first-order control on climate fluctuations while silicate weathering acts to modulate atmospheric CO<sub>2</sub> as a secondary regulative process (Ridgwell and Zeebe, 2005; Lee and Lackey, 2015; McKenzie et al., 2016). Recent studies have found support for links between global arc activity and icehouse-greenhouse transitions 25 using detrital zircon ages, modelling and experimental techniques, particularly as drivers of greenhouse

conditions in the Cambrian (McKenzie et al., 2016; Cao et al., 2017), Jurassic-Cretaceous (McKenzie et al., 2016) and early Paleogene (Lee et al., 2013; Carter and Dasgupta, 2015; Cao et al., 2017).

5 Recently, carbon and helium isotope analysis from modern volcanic arc gas has provided evidence that volcanic arcs that assimilate crustal carbonate in their magmas through decarbonation reactions have a greater atmospheric CO<sub>2</sub> contribution than other types of arcs (Mason et al., 2017). Modern crustal carbonate reservoirs are a result of global organic and inorganic carbonate production throughout the Phanerozoic, which has contributed to the build-up of expansive, shallow-water carbonate sequences including ramps and rimmed shelves along continental margins, hereafter referred to as ‘carbonate platforms’ (Kiessling et al., 2003). At different points in Earth’s history, emissions from continental, carbonate-intersecting arcs (CIAs) may have dominated global volcanic carbon flux, such as during the 10 Cretaceous (144-65 Ma) where continental arcs are hypothesised to have been longer than modern day lengths and where a greenhouse climate prevailed (Lee et al., 2013; van der Meer et al., 2014; Cao et al., 2017). It is plausible that crustally-derived carbon at other points in Earth’s history has played a significant role in affecting global climate, and that there may be a periodic trend in carbon released from continental arcs through time related to ~50 Myr flare-ups -(Lee and Lackey, 2015) and continent assembly and dispersal which cause transitions from intraoceanic-arc- to continental-arc-dominated states (Lee et al. 2013). However, ~~yet~~ it is difficult to test this hypothesis, especially due to preservation bias in the geological record (Berner, 2004).

20 This challenge is addressed using wavelet analysis, which attempts to detect correlations and periodicities in two time series at any scale or duration (Grinsted et al., 2004). Compared to other windowing techniques that find time-dependent correlations between two signals such as the windowed Fourier transform, the wavelet transform is preferable because it is localised (bounded) in both time and frequency, whereas Fourier transforms are only localised in frequency (Torrence and Compo, 1998). Hence, the wavelet transform can better constrain correlations in time and is better-suited than the Fourier transform to approximating data with sharp discontinuities, such as those addressed in this investigation.

25 We aim to investigate whether volcanic arcs that interact with buried carbonate platforms (CIA activity) are significantly different to volcanic arcs that do not intersect with buried carbonate reservoirs (non-



carbonate-intersecting arc [NCIA] activity) in influencing global palaeo-atmospheric CO<sub>2</sub> concentrations. Our study explores volcanic arc activity as an aspect of the deep Earth carbon cycle using a combination of plate reconstruction software and wavelet analysis. Only Cao et al. (2017) and this study have endeavoured to look beyond the use of palaeogeographic maps to explore the distribution of continental arcs through space and time in a plate tectonic framework. Furthermore, wavelet analysis is used to deconvolve two time series at a time (e.g. our CIA and NCIA lengths with the palaeo-atmospheric CO<sub>2</sub> record by Park and Royer [2011]) to uncover any periodicities or correlations. With a plate model that extends to 410 Ma, We model space-time trends of global subduction zone and carbonate platform interactions since the Devonian (410 Ma), where subduction zone lengths are used as a surrogate measure for volcanic arc lengths. This paper is accompanied by an open-source ‘subduction zone analysis toolkit’ (Doss et al., 2016) to help enable the use of digital plate motion models (e.g. Matthews et al., 2016) and other tools to investigate aspects of the deep carbon cycle.

## 2 Modelling global arc activity and carbonate platform evolution

We investigate the combined effect of global volcanic arc activity and the subsequent decarbonation of crustal carbonates by arc magmas to create a first-order approximation of the contribution of carbonate-intersecting arc volcanism to palaeo-CO<sub>2</sub> levels over the past 410 Myr. An ‘Accumulation Model’ of carbonate platform evolution was produced to represent the long-term persistence and build-up of carbonate platforms in upper continental crust. Global subduction zone lengths are used as a surrogate for global volcanic arc lengths through time, where we assume a ~~one-to-one~~ general correspondence of arc lengths to volcanic activity. Using open-source and cross-platform plate reconstruction software GPLates (<http://gplates.org/download.html>) and a new pyGPLates Python application programming interface (API) (<https://www.gplates.org/docs/pygplates/>), we track the interaction between subduction zones and major carbonate platforms through time to better understand the effect of carbonate-intersecting arc magmatism on palaeo-CO<sub>2</sub> and palaeoclimates interpreted from proxy data (Park and Royer, 2011).

## 2.1 An 'Accumulation' model of carbonate platform development

Palaeogeographic maps of carbonate platforms spanning the Phanerozoic from Kiessling et al. (2003) were used to assemble a time-dependent evolution of carbonate platform accumulation. The twenty-four maps represent the spatial extent of carbonate platforms at the maximum marine transgression within each epoch for the Phanerozoic (Kiessling et al., 2003). The geometries were georeferenced to geographic WGS84 co-ordinates in ArcGIS (ESRI, 2011) to be compatible with GPlates, the open-source plate reconstruction software (Boyden et al., 2011).

A GPlates file was created to depict ~~continuously~~ evolving carbonate platform development from 410 Ma to present-day. Creating this model involved stitching together twenty-four carbonate platform shapefiles, where reef patterns in each epoch had been adjusted to the Golonka and Kiessling (2002) Phanerozoic timescale. However, owing to new chronostratigraphic data, the geological times ascribed to the existence of carbonate platforms in each epoch were converted to the corresponding times in the latest chronostratigraphic scheme given in the 2016 version of the International Stratigraphic Chart (Cohen et al., 2013). Subsequently, the static carbonate platform shapefiles were reconstructed with the rotations and plate geometries associated with an older plate model (Scotese, 2016), similar to the model used by Kiessling et al. (2003). In GPlates, the carbonate platform geometries were assigned Plate IDs based upon their overlapping position within the reconstructed continental geometry.

Carbonate platforms were rotated to their present-day positions, and Plate IDs associated with the Scotese (2016) model were translated into corresponding Plate IDs from the Matthews et al. (2016) plate motion model. By obtaining the present-day geometry of the ancient carbonate platforms, attaching these geometries to any other plate motion model becomes straightforward. The evolving carbonate platform model was created by layering each carbonate platform geometry such that it persists to present-day. The 'Accumulation' Model we implement in this study embodies the idea that carbonate platforms accumulate in crustal reservoirs through time.

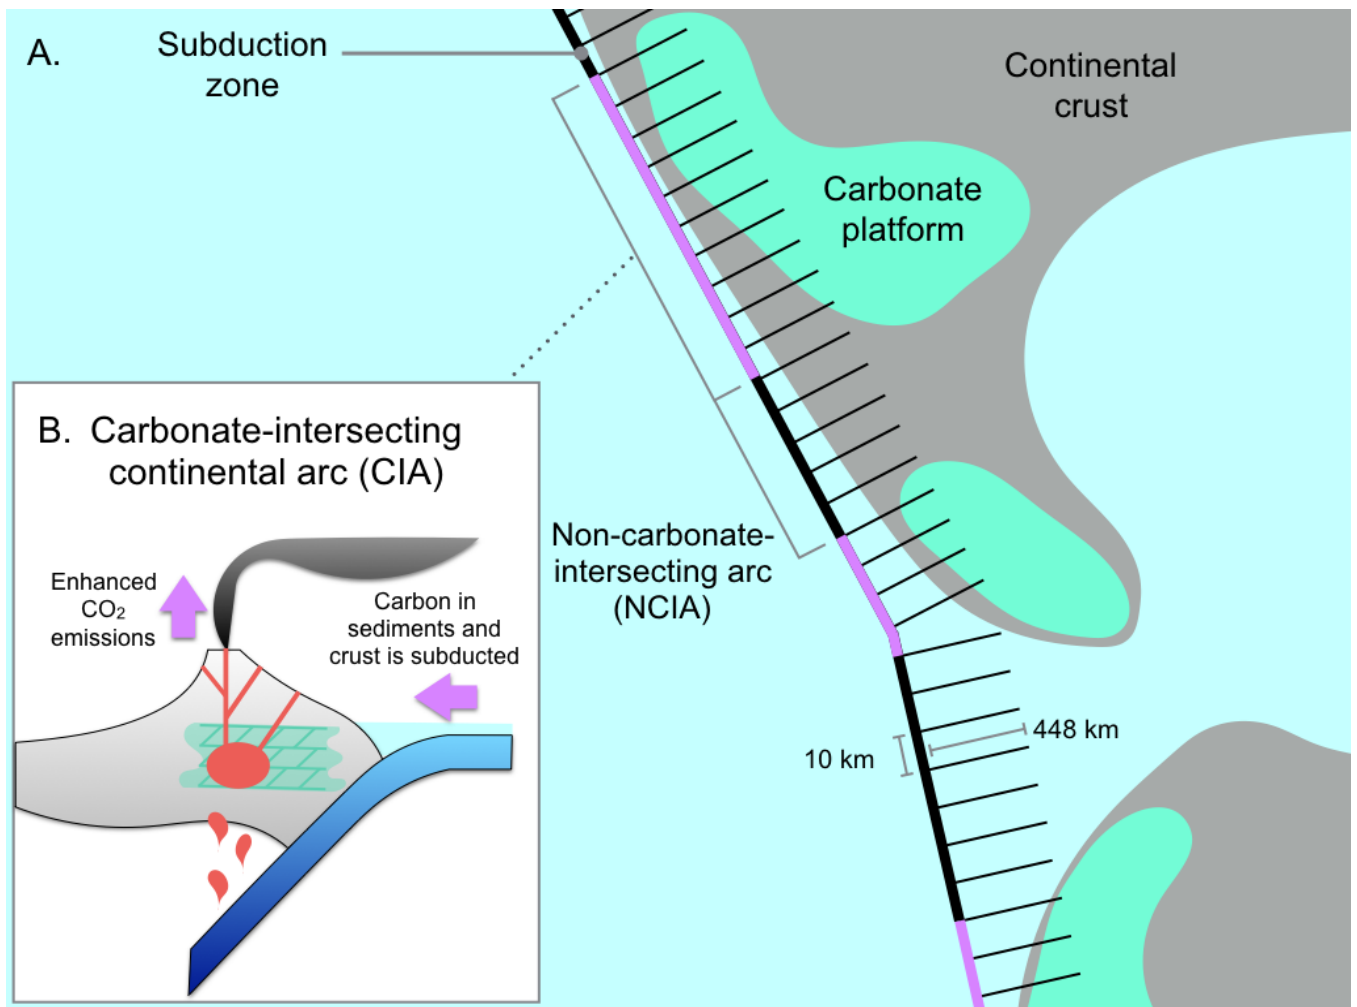

**Figure 1:** (A) Schematic representation of the *grtrack* tool. Using *grtrack*, ~450-km-long cross-profile ‘whiskers’ that were constructed along subduction zones (red-purple and black) spaced 10 km apart in the direction of subduction. At regular intervals along the whiskers, the carbonate platform grid on the overriding plate was sampled where carbonate polygons have a value of 1, and everywhere else is zero. If the whisker intersects with a carbonate platform, it represents 10 km along a carbonate-intersecting volcanic arc. (B) Schematic representations of carbonate-intersecting continental arcs. Carbonate platforms become buried over time, forming reservoirs in the crust. Through assimilation and decarbonation reactions, arc magmas interact with upper-crustal carbonates and liberate significantly more CO<sub>2</sub> emissions than at non-intersecting continental arcs.

## 2.2 Assumptions and limits of the Accumulation Model

- 10 The Accumulation Model is an end-member scenario of how carbonate platforms evolve through time. Carbonate accumulation is assumed to accrete onto continental margins and persist as mid-crustal carbonate reservoirs from deposition to the present (Fig. 1). Ancient carbonate platforms are known to persist to present-day in surface reservoirs, and can be reconstructed from the geological record as they

either outcrop, are sampled by drilling or are interpreted from seismic reflection studies (Kiessling et al., 2003). Some crustal carbonate is inevitably eroded or subducted into the deep mantle, however it is improbable that most reservoirs have been destroyed in the way as most carbonate platforms accumulate on continental margins and are not likely to subduct (Lee and Lackey, 2015). Given limited erosion on passive continental margins, except in the cases of major uplift and deformation through mountain-building, it is far more likely that carbonate platform expansion has exceeded their depletion by erosion through time (Ridgwell and Zeebe, 2005). Moreover, the existence of fossil reef data as far back as the Ordovician (Kiessling et al., 2003) favours the notion that extensive portions of platforms have been well-preserved in continents.

10 Since our model is temporally limited in the Phanerozoic from the Devonian to present day~~to the Devonian~~, it suggests that carbonate-arc intersections would have increased through time, which is likely an oversimplification of the carbonate depositional process on continental margins. In addition, since the accumulation rate of carbonate platforms is variable in both space and time, we apply a simplistic Boolean assumption (i.e., a carbonate platform is likely to persist in the sedimentary record, 15 with an unknown thickness).

A significant limitation of the Accumulation Model is that we assume carbonate platforms have not been significantly depleted by sustained volcanic interaction through time. We follow this assumption because there is no way to account for their rate of depletion given the complexity of inter-dependent factors such as heat, pressure, composition and the duration of interaction (Johnston et al., 2011). The 20 model also does not account for the subduction of some carbonate platforms over the past 410 Ma, although it is expected that accounting for this would not drastically change the results. Finally, because subduction of carbonate platforms is not considered, the Accumulation Model provides an upper bound of carbonate-arc interactions. However, this may be a reasonable proxy for the role of subducted carbonate platforms that would contribute substantial volatiles into the mantle wedge above a 25 subducting slab.

### 2.3 Measuring global subduction zone lengths with pyGPlates

We use the open access global plate motion model from Matthews et al. (2016) to analyse the spatio-temporal distribution of subduction zone volcanic arcs in a deep-time tectonic framework and test the hypothesis that subduction zone arc lengths are correlated with atmospheric CO<sub>2</sub> levels. The model spans much of the Phanerozoic as it links the 410-250 Ma Domeier and Torsvik (2014) and the 230-0 Ma Müller et al. (2016) plate motion models. The pyGPlates library enables access to common GPlates functions using the Python programming language, a framework that facilitates model analysis and data processing. Using the pyGPlates workflow (Doss et al., 2016), global subduction zone boundaries were extracted from the Matthews et al. (2016) plate motion model in 1-million-year time steps from 410 Ma to present-day. Importantly, subduction zone geometries were adjusted to remove any overlapping line segments that would overestimate arc lengths through time.

### 2.4 Computing the intersections of carbonate platforms and subduction zones

We test whether subduction zone volcanic arcs interacting with carbonate platforms are different from non-intersecting arcs in their contribution to global atmospheric CO<sub>2</sub> concentrations, and hence we track the lengths of subduction zones that both do and do not intersect with carbonate platforms in the overriding plate. Carbonate platform geometries were converted to polygons using *grdmask* from the development version of Generic Mapping Tools (GMT) (v.5.2.1; Wessel et al., 2015) which created a Boolean-style mask consisting of closed domains with a value of 1 where carbonate platforms existed and 0 elsewhere. We identified polygons proximal to subduction boundaries through time using the exported subduction zone geometries from the pyGPlates workflow. We compute the signed-distance function, positive toward the overriding plate, on the surface of the sphere for all subduction zones and computed where the carbonate platforms lie within +448 km of the trench. The *grdtrack* tool in GMT was used to create large tracks of ~450 km-long cross-profiles perpendicular to subduction boundaries at a uniform spacing of 10 km, with ‘whiskers’ pointing in the direction of subduction (Fig. 1a). The whiskers had five evenly-spaced nodes to detect intersections with carbonate platform polygons. We determined the ~450 km-long inclusion distance by determining average arc-trench distances using the present-day ‘Volcanoes of the World’ database maintained by the Smithsonian Institution’s Global

Volcanism Program (Siebert and Simkin, 2014). From a sample size of 1023 volcanoes, average arc-trench distances are 287 km with a standard deviation of 161 km, which gives an upper estimate distance of 448 km. This captures ~84% of the location of all volcanic arcs and corresponds to an upper limit ~~by which for interactions carbonate platforms can interact~~ with volcanic arcs in our assumptions.

5 The whiskers function as a buffer, allowing us to identify the lengths of subduction zone boundaries within ~450 km perpendicular radius of a carbonate platform polygon. Cross-profiles that overlap with carbonate platform polygons demarcate areas where arc volcanoes interact with crustal carbonates (Fig. 1b). Due to the complexity and time-variability of subduction, we do not consider times during which flat slab subduction may have occurred, which would result in greater arc-trench distances and is  
10 beyond the scope of this study.

### 3 Linking arc volcanism to palaeoclimate change

Relationships between oscillations in two time-series can be examined using a wavelet analysis to elucidate the scales and time intervals where the proxy record and modelled data display correlated, periodic signals.

15 We performed wavelet analysis as a means of identifying localised variations of power between proxy records of CO<sub>2</sub> and modelled carbonate-intersecting arc activity and in turn investigate the temporal evolution of these aperiodic signals. We are able to carry out this analysis as the geophysical data exhibit non-stationarity; dominant periodic signals vary in their frequency and amplitude through time. The continuous wavelet transform (CWT) is particularly useful for this task  
20 as it better characterises oscillatory behaviours of signals than discrete wavelet transforms. The CWT was applied to decompose arc lengths and proxy signals into time and frequency space simultaneously using functions (wavelets) that vary in width to discern both the high and low frequency features present (Lau and Weng, 1995; Supplement 3). To examine whether trends in atmospheric CO<sub>2</sub> and carbonate-intersecting arcs are connected in some way, the cross-wavelet  
25 transform (XWT) was carried out between the proxy-CO<sub>2</sub> data ([Fig. S1](#)) and each of the modelled data on carbonate-intersecting arc lengths (Supplement 4). The XWT reveals space-time

regions where the two datasets coincidentally have high common power as well as calculating the phase relationships between signals, indicating where two series co-vary (Grinsted et al., 2004). Wavelet coherence (WTC) is computed in tandem with the XWT and determines if the time series are significantly interrelated in the frequency domain.

- 5 All wavelet analysis was carried out for each detrended and filtered time series using the Wavelet Coherence Toolbox™ for MATLAB® based on the statistical approach applied to geological and geophysical data by Torrence and Compo (1998) and Grinsted et al. (2004).

### 3.1 Data filtering

The modelled results and proxy-CO<sub>2</sub> time series were pre-processed for wavelet analysis by detrending and applying a low-pass filter using MATLAB®'s Signal Processing Toolbox™. The proxy-CO<sub>2</sub> time series is non-uniformly distributed with multiple data values at certain time steps. Prokoph and Bilali (2008) stress the importance of keeping a consistent time-scale across all time-series when examining causation between trends. Therefore, the data were first processed so that the median atmospheric CO<sub>2</sub> (ppm) value was taken at all time steps with multiple observations (Fig. S1). The data were then resampled with the MATLAB *resample* function to have 410 uniformly spaced data points across the 410 Myr timeframe (Fig. S1). The function interpolates the time series linearly, and the series was found to be relatively insensitive to the interpolation method used. A moving average filter was applied using the MATLAB *filter* function with a window size of 7 to remove high-frequency noise (Fig. S2). In the time-frequency domain, our focus is on the power in the mid-to-high frequency spectrum and so the moving average filter was designed to remove periods less than 5 Myrs. As a result, the analysis does not capture any geologically-rapid (few Myrs) changes in CO<sub>2</sub> that may be driven by changes in plate tectonics and carbonate platform-arc interactions.

Rather than comparing ~~modelled data~~ estimates from the Accumulation Model with Phanerozoic atmospheric CO<sub>2</sub> models like COPSE (Bergman et al., 2004) or GEOCARBSULF (Berner, 2006), results were compared to the proxy-CO<sub>2</sub> record compiled by Park and Royer (2011) because the unresolved uncertainties in model calculations may have rendered comparisons less meaningful than when comparing with proxy records. The proxy-CO<sub>2</sub> dataset presented by Park

and Royer (2011) is an expanded version of the Royer (2006) collection, which originally incorporated data from 490 sources from the Phanerozoic (542 Ma to present) to present including palaeosols, foraminifera, stomatal indices,  $\delta^{11}\text{B}$  in marine carbonates and the  $\delta^{13}\text{C}$  of liverworts. The collection was chosen as it is the most up-to-date proxy- $\text{CO}_2$  data with the highest temporal resolution available.

## 4 Results

### 4.1 Continuous Wavelet Transform (CWT)

CIA lengths exhibit ephemeral mid- to long-wavelength periodicities that appear to dominate for prolonged time intervals, yet are completely absent during others. A significant periodic component in the 24-48 Myr band exists from 300 to 350 Ma, however, the signal disappears in the following time period between 300 and 225 Ma (Fig 2a). The 24-48 Myr periodic signal returns between 225 to 125 Ma, transitioning into the 48-60 Myr band between 150 and 100 Ma. Between 100 and 50 Ma, significant power in the signal returns in the 14-48 Myr band. ~~Wavelet power is highest in wavebands  $> 80$  Myrs, as an 80-100 Myr cyclic signal becomes significant between 190 and 110 Ma, remembering that the spectrum outside the Cone of Influence (COI) must be excluded from analysis due to distortion.~~ In contrast, there are broad regions where signals of mid- to long-wavelength components remain strong in the NCIA length data (Fig. 2b). Notably, the strongest significant signal components are in the 48-96 Myr band in the 325-125 Ma time period and the 24-32 Myr band in the 325-100 Ma time period, demarcating a broad region of power where, conversely, there is distinctly no signal component in the CIA length signal (Fig. 2a). At certain time periods the 10-18 Myr signal component in NCIA lengths becomes significant, which is not identifiable in CIA data.

Total global subduction zone lengths have a number of clear and persistent signals through time, primarily in the 24-32 Myr, 48-64 Myr and 100-128 Myr wavebands (Fig. 2d). The long-term, 100-128 Myr periodicity is not well localised in time as much of the result lies outside the COI. Intermittent, sporadic regions of short- to mid-wavelength signal components appear in the proxy- $\text{CO}_2$  record, with the highest peaks within a confidence level of 95% occurring between 350 to 250 Ma (Fig.



2c). During this time period, a prominent peak of ~32 Myr cycles appears, transitioning into a broader 12-36 Myr band between 300 and 250 Ma (Fig. 2c). No other waveband in the proxy-CO<sub>2</sub> record is characterised by significant spectral power within the COI. ~~Total global subduction zone lengths have a number of clear and persistent signals through time, primarily in the 24-32 Myr, 48-64 Myr and 100-128 Myr waveband (Fig. 2d). The long-term, 100-128 Myr periodicity is not well localised in time as much of the result lies outside the COI.~~

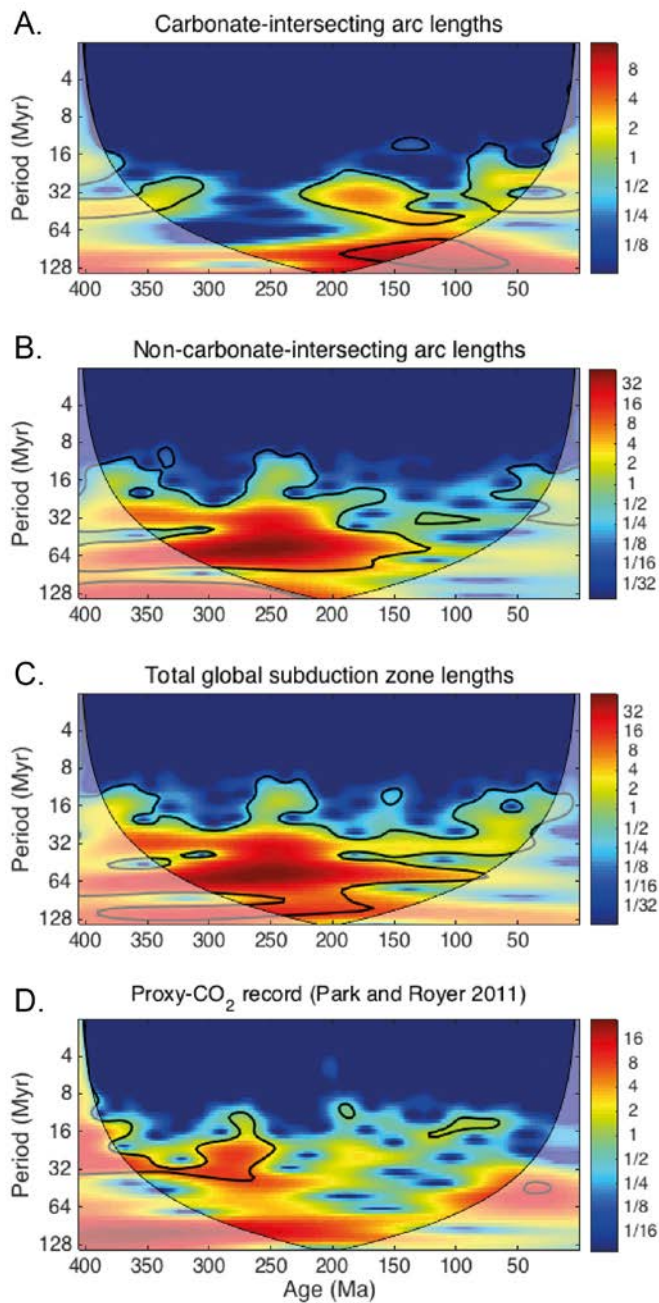

**Figure 2:** Continuous wavelet transforms (CWT) for (a) CIA lengths; (b) NCIA lengths; (c) total global subduction zone lengths and (d) the proxy-CO<sub>2</sub> data from Park and Royer (2011). Thick black contours designate the 5% significance level against a red noise background spectrum. The cone of influence (white translucent region) is where edge effects distort the spectrum. The colour bar indicates the wavelet power, with hotter colours corresponding to the maxima. Note the logarithmic scale of the Period (Myr) axis.

5

## 4.2 Cross-wavelet Transform (XWT) and wavelet coherence (WTC)

The periodic terms common in the arc length time series and the proxy-CO<sub>2</sub> record were investigated further using XWT and WTC. Figure 3 shows the XWT comparing the proxy data and the carbonate-intersecting arc lengths data. ~~A distinct lack of co-varying peaks for periods less than ~5 Myrs in length reflects the low pass filter attenuating small scale oscillations in all time series.~~ Strong joint power at scales greater than 64 Myrs was detected between both the CIA lengths and NCIA lengths and the proxy-CO<sub>2</sub> record, however, the result is never above the 95% confidence level (Fig. 3b).

Intervals of high joint power between CIA lengths and proxy-CO<sub>2</sub> trends (410-280 Ma, 210-150 Ma and 75-0 Ma) are interspersed with intervals of low joint power (280-210 Ma and 150-80 Ma). In the ~32 Myr band during 360-280 Ma, peaks in CIA activity precede peaks in palaeo-atmospheric CO<sub>2</sub> by close to 90° and in the ~40 Myr band during 75-0 Ma, where the majority of the significant region lies outside the COI (Fig. 3a). In other words, during these intervals CIA activity leads atmospheric CO<sub>2</sub> levels by ~ 6-8 Myr. Only the interval from 75-0 Ma is confirmed by WTC as being coherent through time. In the 210-150 Ma time interval, CO<sub>2</sub> peaks exhibit a ~45-90° lead (~5 Myr) over CIA activity to the anti-phase in the 20-40 Myr band (Fig. 3a). Considering the non-uniqueness problem outlined by Grinsted et al. (2004), the region of 90° phase difference may also be interpreted as a ~5 Myr in-phase lag of CO<sub>2</sub> after CIA peaks. The lack of significant coherence in this region suggests coincidence rather than causation.

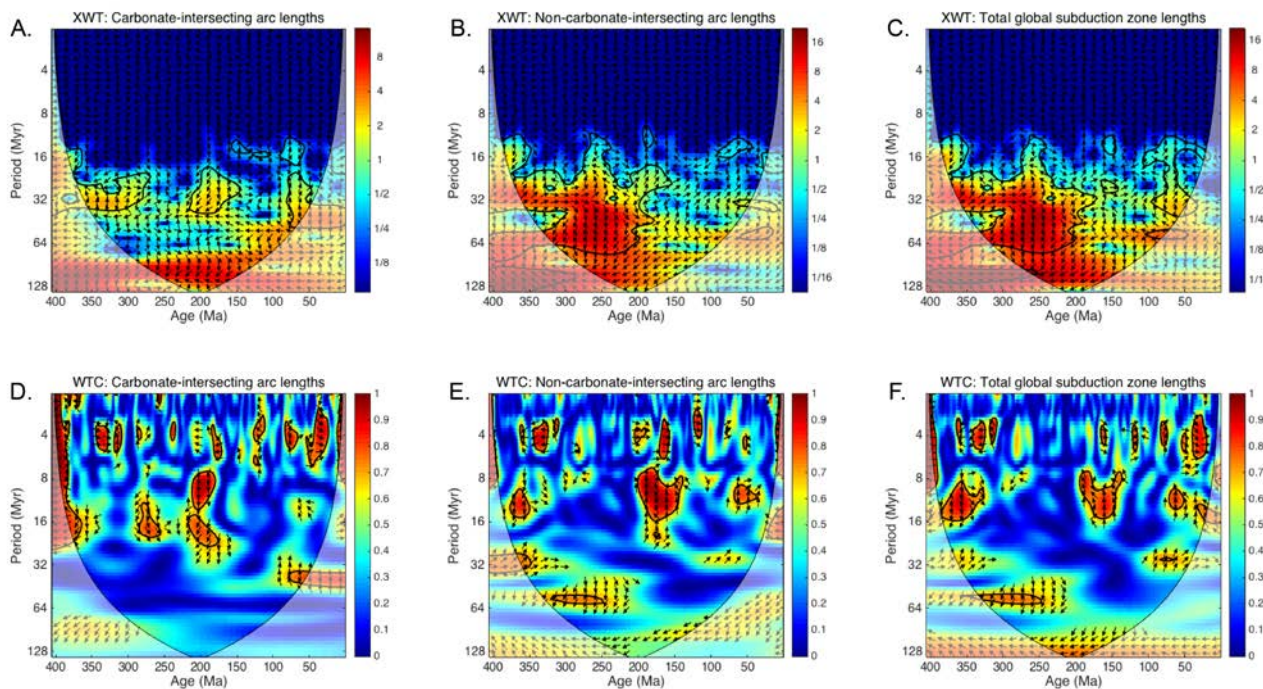

**Figure 3:** The cross-wavelet transforms (XWT) (top) and wavelet coherence (WTC) (bottom) for (a,d) CIA lengths; (b,e) NCIA lengths; (c,f) total global subduction zone lengths respectively and the proxy- $\text{CO}_2$  record (Park and Royer 2011). Thick black contours designate the 5% significance level against a red noise spectrum. The white translucent region designates the cone of influence (COI). The colour bar indicates the magnitude of cross-spectral power for the XWT, and for the WTC it represents the significance level of the Monte-Carlo test. The arrows indicate the phase relationship of the two time series in time-frequency space, where east-pointing arrows indicate in-phase behaviour, west-pointing arrows indicate anti-phase behaviour, north-pointing arrows indicate that the arc or subduction zone activity leads the  $\text{CO}_2$  peaks and south-pointing arrows indicating that  $\text{CO}_2$  peaks lead arc or subduction zone activity.

5

10 The WTC between CIA lengths and the proxy- $\text{CO}_2$  record does not show appreciable ~~and nor~~ prolonged coherence through time (Fig. 3d). However, at distinct intervals the WTC confirms the significance of three regions of high cross-amplitudes: the 14-24 Myr periodicity between 380-360 Ma; the 18-24 Myr periodicity between 200-180 Myr; and the 40-48 Myr periodicity from 75-0 Ma (although much of the significant region lies outside the COI and thus is not localised in time). Phase arrows for periodicities

15 prevalent during 380-360 Ma and 200-180 Ma indicate that CIA length peaks are anti-correlated with  $\text{CO}_2$  peaks and lag by  $\sim 60^\circ$  (2-4 Myrs) whereas from 75-0 Ma, locked phase arrows in the 20-40 Myr band indicate arc length peaks lead  $\text{CO}_2$  by approximately  $90^\circ$  (10 Myrs) (Fig. 3d). ~~Noisy regions of high coherence and mixed phase signals that coincide with regions of low cross-spectral power for  $\ll$~~

~~8 Myr periodicities are disregarded as artefacts as the low-pass filter attenuated short wavelength frequencies.~~ Large regions in the 24-40 Myr band of high joint power (i.e. for 410-280 Ma and 210-150 Ma) were not confirmed by wavelet coherence (Figs. 3a, 3d).

NCIA peaks also shares high joint power with proxy-CO<sub>2</sub> peaks at similar intervals to CIA peaks in the 20-48 Myr band, but in contrast shows very high joint power between 275-200 Ma where CIA peaks do not (Fig. 3b). In the longer-wavelength band (40-80 Myr) between 300-200 Ma, high joint power exists between NCIA and proxy-CO<sub>2</sub> peaks a trend not exhibited in CIA activity (Figs. 3b, 3a). The phase relationship shows the opposite of climate forcing behaviour, where NCIA peaks lag 8-20 Myrs behind palaeo-atmospheric CO<sub>2</sub> peaks.

Only a few significant areas of the XWT between NCIA and proxy-CO<sub>2</sub> data is confirmed by wavelet coherence above the 95% confidence level. Some of these areas are common between proxy-CO<sub>2</sub> and both CIA and NCIA lengths, specifically at 375-350 Ma and 190-175 Ma (Figs. 3d, 3e). In the 10-15 Myr waveband between 375-350 Ma, anti-phase, negatively-correlated behaviour exists where palaeo-atmospheric CO<sub>2</sub> peaks lead NCIA lengths by approximately 90° (3-4 Myrs) (Fig. 3e). Considering the non-uniqueness problem of phase analysis, this could be interpreted as a positively correlated signal with arc activity leading palaeo-atmospheric CO<sub>2</sub>. This trend is also exhibited between CO<sub>2</sub> peaks and CIA lengths during a similar time interval (Fig. 3d). ~~Significant but short lived coherence between NCIA lengths and the proxy CO<sub>2</sub> record in the 10-16 Myr and ~18 Myr waveband between 190 and 175 Ma approximately corresponds to an area of coherent power between CIA and proxy CO<sub>2</sub> data (Figs. 3d, 3e). A notable difference is that phase arrows in the 10-16 Myr waveband indicate that the NCIA and proxy CO<sub>2</sub> peaks are in phase with NCIA peaks leading by between 45° to 90° (3-4 Myr), whereas anti-correlated behaviour exists between CIA length peaks and proxy CO<sub>2</sub>, where CIA lengths lag proxy CO<sub>2</sub> peaks by the same degree (45°-90°). The phase opposite discrepancy can be explained by CIA and NCIA lengths, which sum to total subduction zone lengths, having directionally opposite trends between 190 and 175 Ma (Fig. 4).~~

Between 400 and 350 Ma, significant coherence confirms cross-spectral power and closely in-phase behaviour in the 30-32 Myr waveband of NCIA lengths, yet most of the significant region lies outside



the COI (Figs. 3b, 3d). Phase arrows in the ~64 Myr band between 310 and 250 Ma suggest palaeo-atmospheric CO<sub>2</sub> peaks led NCIA peaks by approximately 10 Myrs, the opposite of climate forcing behaviour. The XWT and WTC for proxy-CO<sub>2</sub> correlations with total subduction zone lengths exhibit a very similar spectrum to results for NCIA lengths (Figs. 3e, 3f). One exception is that coherence in the 5 30-32 Myr waveband becomes dominant between 90-70 Ma, a correlation that was not above the 5% significance level when examining NCIA lengths. Phase relationships in this interval indicate that in-phase CO<sub>2</sub> peaks are leading by ~60° (~5 Myrs).

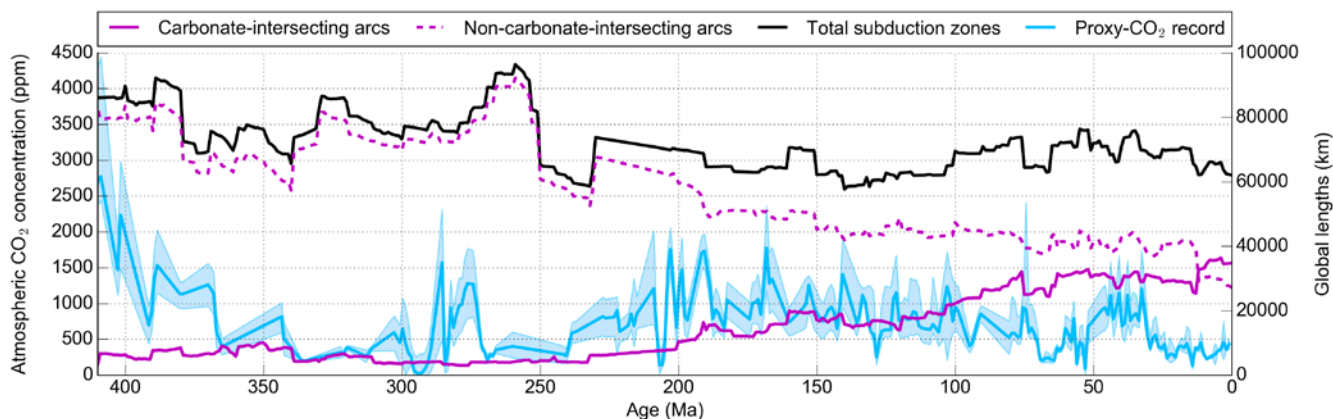

10 **Figure 4:** Total global lengths of subduction zones (black) (as a surrogate measure for volcanic arc lengths) compared with arcs that intersect with buried crustal carbonate platforms (magenta, solid) and arcs that do not intersect crustal carbonate platforms (magenta, dashed). The proxy-CO<sub>2</sub> record (blue line) from Park and Royer (2011) with upper and lower bounds (blue envelope) are displayed for comparison.

### 4.3 Comparing carbonate-intersecting arc length and palaeo-CO<sub>2</sub> trends

15 Coherence analysis suggests that CIA lengths and palaeo-atmospheric CO<sub>2</sub> peaks may not be well correlated prior to 100 Ma, however, during some time windows, periodic behaviour may be correlated. These three areas of significance highlighted by the XWT and WTC analysis are between 380-350 Ma, 210-190 Ma and 75-50 Ma.

20 Between 380-350 Ma, coherence analysis highlights possible in-phase 30-32 Myr periodic behaviour between both global subduction zone lengths and NCIA lengths and CO<sub>2</sub> peaks which is validated by trend data despite much of the significant region lies outside the COI (Fig. 3d). Decreasing total subduction zone and NCIA lengths mirror the CO<sub>2</sub> record trend as lengths drop from ~92 000 km to

~69 000 km and ~83 000 km to ~57 000 km respectively (Fig. 4), yet the signal was coherent at the 95% significance level for NCIA lengths (Figs. 3e, 3f). In contrast, wavelet analysis found the opposite of climate forcing behaviour for CIA lengths over this interval where CO<sub>2</sub> peaks led CIA lengths (Fig. 3c), and in line with the analysis, CIA lengths remain relatively low (3 000-10 000 km) over this period (Fig. 4). It is evident that the magnitude of change in CIA lengths cannot explain the precipitous drop in palaeo-atmospheric CO<sub>2</sub> (2 750 ppm to 200 ppm) taking place from ~410 Ma to ~340 Ma (Fig. 4).

Non-unique interpretations of phase behaviour in the WTC are non-conclusive regarding whether total subduction zones, CIA or NCIA activity or CO<sub>2</sub> peaks are leading during the 210-190 Ma interval. It appears in the XWT and WTC that CIA activity lags palaeo-atmospheric CO<sub>2</sub> peaks, whereas NCIA activity and total subduction length peaks lead palaeo-atmospheric CO<sub>2</sub> peaks (Figs. 3e, 3f). We observe a rapid reduction in NCIA lengths (~63500 to 50000 km) and global subduction zones (~ 71 000 to 65 000 km) simultaneously with a relatively dramatic increase CIA lengths, which almost double (~7400 to ~16300 km) between 210-190 Ma (Fig. 4). However, as only small-scale periodic behaviour (~10 Myrs) exists for palaeo-CO<sub>2</sub> but not for CIA or NCIA lengths during this period point to a scale mismatch in the CWT results (Fig. 2). Hence, neither CIA, NCIA nor global subduction zone lengths can adequately explain large-amplitude (~45-~1 800 ppm), high-frequency (~10 Myr) fluctuations in palaeo-atmospheric CO<sub>2</sub> levels over the 210-190 Ma period (Fig. 4).

Between 75-0 Ma, XWT and WTC analysis highlighted a significant domain of high coherence between CIA length data and the proxy-CO<sub>2</sub> record in the 40-48 Myr waveband with an arc-leading relationship of ~10 Myrs (Fig. 3c, 3d). Over the same time interval, an area of high coherence with arc-leading relationships occurs in the ~32 Myr waveband between global subduction zone lengths and the proxy-CO<sub>2</sub> record (Figs. 3c, 3f). This result is reflected in trend data, where CIA and global subduction zone lengths reach a local maximum at ~75 Ma (~32 000 km and ~74 000 km respectively), drop sharply for a period of ~10 Myrs before recovering between 63-50 Ma (on average ~32 000 and ~72 000 km in length, respectively) (Fig. 4). The proxy-CO<sub>2</sub> data mirror this decline-and-recovery trend, as palaeo-atmospheric CO<sub>2</sub> levels decline substantially between 75-70 Ma (~1200 ppm to ~250 ppm) and recover after 60 Ma (~700 ppm) (Fig. 4). NCIA-CO<sub>2</sub> XWT results highlight significant joint power during the same interval, but it was not confirmed as coherent behaviour by the WTC (Fig. 3b, 3d). In accordance,

NCIA lengths do not sustain the same linked behaviour as CIA and global subduction lengths over this interval.

## 5 Discussion

The Accumulation Model was constructed in a way that resulted in increased subduction zone interactions with carbonate platforms in the overriding plate through time. Indeed from 150 Ma onward, CIA lengths consistently made up ~70% of total global subduction zone lengths (Fig. 4). Given this cumulative effect, we would expect that the growing reservoir of carbonate platforms would result in linked, periodic behaviour in the more recent past compared to 400 Ma if CIAs had a climate-forcing effect. Ultimately, our study does not support the hypothesis that carbonate-intersecting arcs have contributed substantially to atmospheric CO<sub>2</sub> levels over the past 410 Myrs. However, potential issues with the large uncertainties in the proxy record, complexities in reconstructing pre-Pangea subduction zones and carbonate platforms, as well as the requirement to filter the time series may influence this result. CIA lengths and the proxy-CO<sub>2</sub> record are largely independent with no strong leader relationship that is consistent through time, with the exception of the most recent ~75 Myrs.

Wavelet analysis highlights many intervals of significant and high joint power in all XWT spectra, yet they were not coherent and thus could not be distinguished from coincidence, such as the region of high power in ~10-64 Myr wavebands from 300-200 Ma for global subduction zone lengths and NCIA lengths (Figs. 3b, 3c). In some intervals, wavelet analysis highlights the opposite of climate-forcing behaviour between CIA lengths and palaeo-atmospheric CO<sub>2</sub> levels (i.e. where CO<sub>2</sub> peaks precede arc lengths), such as between 210 and 190 Ma (Fig. 3a). Similarly, a long-lived coherent ~64 Myr signal in both the NCIA lengths and global subduction zone lengths was found to be a significantly coherent signal at the 95% level (Figs. 3e, 3f), yet the CO<sub>2</sub> peak occurred ~16 Myrs prior to NCIA and global subduction length peaks and the result was not found to be meaningful in the context of climate-forcing behaviour (Fig. 4).

A 30-32 Myr periodicity in the NCIA length signal in the 375-350 Ma interval may be interpreted as being linked to a concomitant decline in palaeo-atmospheric CO<sub>2</sub>, a relationship which was similar in



the global subduction zone lengths signal yet was insignificant at the 95% level. Both palaeobotanical and modelling investigations suggest that the rise of vascular land plants (Algeo et al., 1995) and heightened chemical weathering (Berner and Kothavala, 2001) were the dominant forces controlling the large reduction in atmospheric CO<sub>2</sub> during the Late Devonian, however, this result does not preclude the notion that waning CIA lengths may have partially contributed to the cooler background climate. Our results suggest that arc lengths have not consistently modulated the CO<sub>2</sub>-forced transitions between warmer and cooler climates throughout the Phanerozoic. However similar trends in CIA lengths and global subduction zone lengths between 75-50 Ma suggest that the Late Cretaceous to Early Palaeogene warm climate may be a phenomenon forced by global subduction zone lengths rather than carbonate-intersecting arc lengths alone.

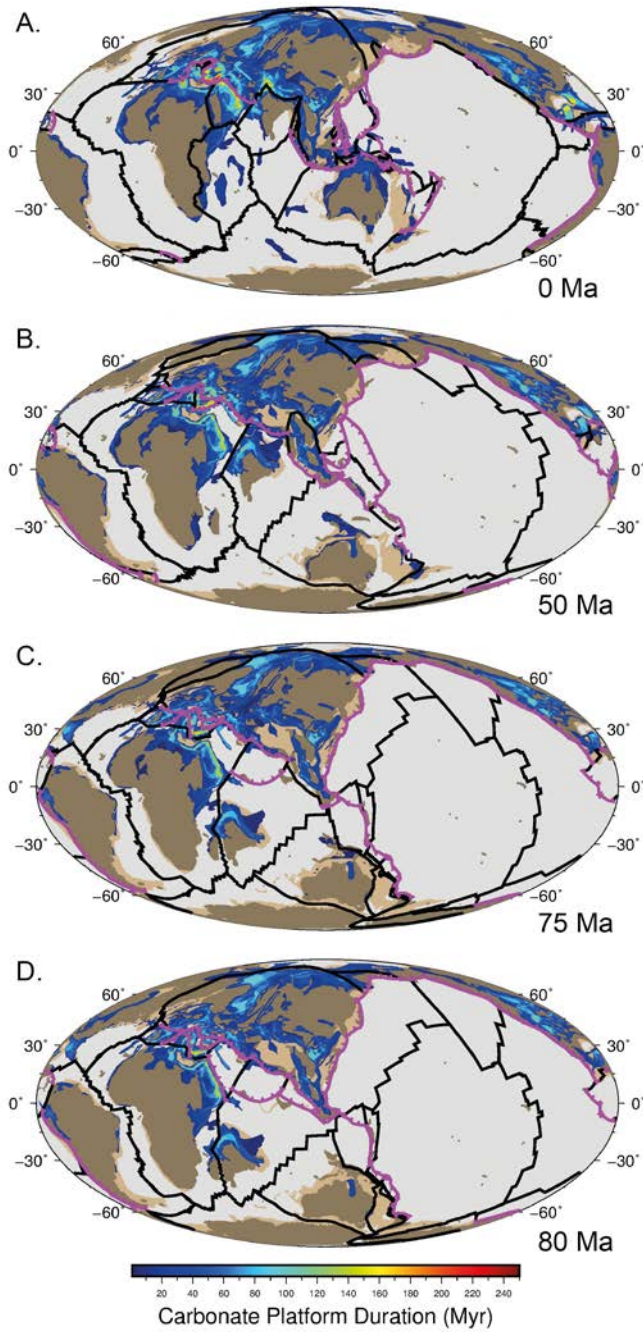

**Figure 5:** Plate reconstructions with plate boundaries (black), subduction zones (purple) and distributions of carbonate platforms. Carbonate platforms are distributed according to the Accumulation Model at 0, 75 and 80 Ma. Colour bar corresponds to the duration of time that the carbonate platforms were actively developing for in the crust.

## 5.1 Implications for Late Cretaceous to Early Palaeogene Climate

Only during the most recent 75 Myrs is it plausible that CIA lengths influenced atmospheric CO<sub>2</sub>, yet there are two factors that prevent us from viewing these correlations as causative. Firstly, while the ~32 Myr cyclicity is coherent and significant at the 5% level, it is not time-localised between 60-0 Ma as the result lies outside the COI. Secondly, CIA length trends passively mirror total global subduction zone lengths during this time, suggesting that it is not specifically the CO<sub>2</sub> liberated at CIAs that drove atmospheric CO<sub>2</sub> peaks, but net global volcanic CO<sub>2</sub> emissions.

However, the period between 75-50 Ma seems to be distinct from other times as a significant coherency occurs. The changing distribution of CIA lengths and subduction zones between 75 and 50 Ma may have contributed to the well-studied greenhouse climate 51-53 Ma, known as the Early Eocene climatic optimum (EECO), where temperatures were about  $14 \pm 3^\circ\text{C}$  warmer than the pre-industrial period (Caballero and Huber, 2013). While climate interactions and feedbacks leading to the greenhouse state remain uncertain, climate sensitivity to CO<sub>2</sub> forcing is likely (Anagnostou et al., 2016).

According to the Accumulation model, the dramatic change that characterised the reduction in CIA lengths ~75 Ma included the termination of a ~3 000-km-long section of a north-dipping intra-oceanic subduction zone in the Northern Tethys ocean, corresponding to the Trans-Tethyan Subduction System (Jagoutz et al., 2016), and the cessation of subduction along the Sundaland margin (McCourt et al., 1996; Zahirovic et al., 2016) (Figs. 5c, 5d). The intra-oceanic subduction in the Neo-Tethys in our model would not be classified as a carbonate-intersecting arc due to the overriding plate (in this case largely oceanic lithosphere) lacking extensive carbonate platforms. In any case, this intra-oceanic subduction zone in the Accumulation Model corresponds to the emplacement of the peri-Arabian ophiolite belt along the Afro-Arabian continental margin between 80-70 Ma rather than an Andean-style arc, the erosion of which has been posited as a cause of global cooling following the EECO (Jagoutz et al., 2016) (Figs. 5c, 5d). We can therefore rule out arc-related volcanism in this region as a contributor to high CO<sub>2</sub> levels given that the shut-down of this arc is not associated with the cessation of Andean-style subduction.

The termination of arc volcanism particularly along the Sundaland margin, where a large area of carbonate platforms are buried, contributed ~3 000 km to the global reduction in CIA lengths by

~7 000 km between 75-65 Ma (Figs. 5b, 5c). The resumption of subduction along the Sunda-Java trench at 65 Ma in the model as well as the emplacement of a set of carbonate platforms in the lower latitudes at 63 Ma explain the modelled results of an increase in CIA lengths at 63 Ma which persist past 50 Ma (Fig. 5b). The EECO occurred approximately 10 Myr later, supporting the 10 Myr lag in peaks of a  
5 ~40 Myr periodicity found by the CIA-proxy-CO<sub>2</sub> XWT and WTC (Fig. 3a). Our analysis shows a concomitant increase in NCIA lengths (Fig. 4), but the periodic behaviour was not found to be significantly coherent and so coincidental peaks cannot be ruled out. Modern volcanic CO<sub>2</sub> output from arcs in Indonesia, Papua New Guinea, parts of the Andes and Italian Magmatic Province are strongly influenced by carbonate assimilation (Mason et al., 2017) and volcanoes in those regions currently  
10 contribute significantly to global atmospheric CO<sub>2</sub> flux (Carter and Dasgupta, 2015). Assuming a similar subduction style, this result gives plausibility to the idea that volcanic activity along the Sunda-Java trench during the Cretaceous was also significantly contributing to global CO<sub>2</sub> output.

Previous studies have suggested that global arc CO<sub>2</sub> contributed to the baseline warm climate of the Late Cretaceous and late Palaeogene, due to the greater size of carbonate reservoirs in continents and  
15 the increased continental arc lengths (Lee et al., 2013; Carter and Dasgupta, 2015; McKenzie et al., 2016; Cao et al., 2017). Our results agree well with the hypothesis, as a relative increase in CIA lengths has been linked to a peak in atmospheric CO<sub>2</sub> from 75-50 Ma, contributing to enhanced CO<sub>2</sub> degassing. However, it cannot be determined from this study whether the increase in global arc lengths is more important than the relative increase in CIA lengths.

## 20 **5.2 Limitations of wavelet analysis**

Wavelet analysis is inherently sensitive to the shape of signals, and as such, adjustment of filtering and processing techniques introduces variations in the results. The choice of interpolation method of the proxy-CO<sub>2</sub> record may subdue actual oscillations in the signal, affecting phase relationships and confidence intervals. Similarly, a size-7 moving average window filter was chosen to remove high-  
25 frequency noise, yet it may have moved trends forward in time, which ultimately changes whether peaks overlap or not and adds uncertainty to results. Peaks in the XWT were robust in that they were found to appear in XWT plots regardless of the intensity of smoothing, yet the significance contours

differed strongly due to smoothing. For instance, with a longer low-bandpass filter, small-scale oscillations <5 Myrs were removed, reducing areas of significant power in the shorter wavebands. Similarly, when experimenting with a high-bandpass filter, significant regions were directed away from the longer periodicities of >64 Myrs to shorter periodicities. The low-bandpass filter was chosen to  
5 remove the noise for smaller periodicities where fluctuations were less likely to represent trends and more likely to represent artefacts of interpolation, yet this measure erases the fidelity of short-term oscillations in the time series. Hence detail on the <10 Myr scale is not adequately represented, and thus our study was unable to evaluate short-term relationships.

Our analysis technique cannot quantify the error that propagates from uncertainty in the proxy-CO<sub>2</sub> record and volcanic arc length signal through to the correlation uncertainty. Interpolation and filtering of the proxy-CO<sub>2</sub> record necessarily cannot account for the uncertainty displayed by the envelope as only one signal can be extracted. Similarly, the Matthews et al. (2016) tectonic plate model (Matthews et al., 2016) only represents one interpretation of geological data which becomes sparse earlier than 220 Ma. The nature of using a tectonic framework means only one arc length signal can be extracted from  
10 the model, which does not lend well to error estimations of error. In this way, the selection and comparison of two signals with large uncertainty are not sufficient in eliciting well-constrained periodic behaviour and true correlations.

~~While sensitivity testing was carried out on filtering, interpolation and smoothing techniques of the proxy CO<sub>2</sub> record, a robust sensitivity analysis was beyond the scope of this study. Additionally, the nature of using a tectonic framework to estimate total subduction zone lengths does not lend well to estimations of error as only one model was used to extract arc length data, and so only one signal could be extracted. In this way, the selection and comparison of two signals with large uncertainty are not sufficient in eliciting periodic behaviour and are not likely to demonstrate true correlations.~~

XWT analysis describes areas with high power which can be misleading when the XWT spectrum is not  
25 normalised. For instance, areas of high joint power were found where relatively flat peaks in the CIA length data occurred simply because of the large amplitude of peaks in the proxy-CO<sub>2</sub> data. The vast differences in magnitude do not necessarily constitute a causative relationship. WTC analysis does not present this problem because the spectrum is normalised, and hence periodicities with strong power

were not necessarily found to be coherent (Maraun and Kurths, 2004). The combination of both measures somewhat circumvents the problem of misleading peaks in the XWT, but not all. Given that wavelet analysis is very sensitive to magnitude and timing of peaks, the fact that the uncertainty in our modelled estimates of arc lengths are not well-constrained introduces variability in correlative relationships.

Wavelet analysis, like other signal processing techniques, is limited by the length of the time series data investigated. Periods of greater than half the time series length cannot be examined using this method (Winder, 2002). Therefore, very-long oscillations on the scale of 250 Myr or more could not be derived from our data. One reason for examining patterns on 250 Ma periods is due to the very-long-term nature of supercontinent cycles. The accretion of supercontinents such as Pangea and Rodinia are associated with shortened continental arc lengths, whilst continental break-up and dispersal initiates subduction on the edges of continents, and thus increases continental arc lengths (Donnadieu et al., 2004; Lee et al., 2016). Not only do changing modes of supercontinent break-up or accretion have the potential to influence climate, the opposite causal effect may occur where changes in the long-term climate state can feed back into the coupled system and initiated changes in the tectonic regime (Lenardic et al., 2016). Given that supercontinent cycles exceed 200 Myr in length and exert a large effect on the length of continental arcs (Lee et al., 2013), applying this analysis to plate reconstructions that capture multiple supercontinent cycles (e.g. Meredith et al., 2017) to investigate whether such long-term linkages exist between atmospheric CO<sub>2</sub> and global arc volcanism.

### 20 **5.3 Limitations of model assumptions**

The extent to which our models are representative of volcanic arc CO<sub>2</sub> emissions is limited by some issues with the subduction zone quantification approach. The subduction zone modelling attempted to approximate relative magmatic CO<sub>2</sub> flux without directly measuring it by assuming a constant CO<sub>2</sub> flux and a unit-correspondence of arc lengths to volcanoes. Both assumptions are problematic. There are several dynamic factors that govern arc CO<sub>2</sub> flux such as convergence rates (van der Meer et al., 2014), the composition and volume of subducted sediments (Rea and Ruff, 1996), convergence obliquity (Kerrick and Connolly, 2001), slab volume flux (Fischer, 2008), the relative contribution of

metamorphic decarbonation in the crust and in the mantle wedge (Keleman and Manning, 2015) and the efficiency of decarbonation (Johnston et al., 2011). The model does not account for these factors and assumes that the parameters of CO<sub>2</sub> flux have remained constant in time. In addition, the number of volcanoes per unit length of subduction zones is neither constant through time nor correlated, at least for the circum-Pacific arc and Central American arc (Kerrick, 2001). Furthermore, the Accumulation Model has no way to account for carbonate platform thicknesses, and thus cannot account for the realistic depletion of crustal carbonate reservoirs through time. The inability of the model to incorporate the complexity of depleting carbonate platforms may lead to sampling bias during continental collisions. This highlights an area of future improvement. Taking all limitations into consideration, the Accumulation Model still provides a first-order approximation of changing arc lengths through time as a surrogate measure for CO<sub>2</sub> degassing, especially for the early Phanerozoic which had not previously been modelled at a 1 Myr resolution.

## 6 Conclusions

Wavelet analysis is a useful tool in elucidating coherent, phase-related periodicities between the CO<sub>2</sub> record and various climate forcing factors. Our analysis has revealed that CIA activity is largely independent to the proxy-CO<sub>2</sub> record over the past 410 Myr except for the period 75-50 Ma. The CIA lengths that we derived from an Accumulation model of carbonate platform evolution do not find reasonable and persistent periodicities that explain atmospheric CO<sub>2</sub> flux, however there may be some causal relationships in the Late Cretaceous to Early Palaeogene that are supported by previous modelling efforts.

This analysis lends partial support to the idea that, at certain times, carbonate-intersecting arc activity is more important than non-carbonate intersecting activity in driving atmospheric CO<sub>2</sub>, yet the climate system is vastly complex and the result could mean that other processes have dominated climate feedback mechanisms through time, such as the proliferation of terrestrial plant life (Algeo et al., 1995), silicate weathering (Kent and Muttoni, 2008) and the emplacement of large igneous provinces (Belcher and Mander, 2012).

Generally, an absence of constraints on carbon-climate interactions in deep-time makes it difficult to test hypotheses about greenhouse and icehouse climate states. Clearly, more accurate reconstructions of climate-forcing processes are needed to improve our understanding of the deep carbon system. It is suggested that further investigations be carried out at specific time intervals to eliminate the uncertainty  
5 around the time periods within the COI at the end of the data series (between 410-350 Ma and 50-0 Ma). With adjustments to the parameters and assumptions governing the carbonate platform evolution models, the data can be used as input into fully-coupled planetary-scale climate models. This would provide the most comprehensive and self-consistent approach to understand the contribution of global arc volcanism to the deep carbon cycle.



## Code and data availability

The subduction zone toolkit by Doss et al. (2016) was developed as a product of this research and has been made publicly available for use with open-source plate reconstruction software, GPlates. The toolkit includes all proxy CO<sub>2</sub> data, pyGPlates and bash scripts as well as the Matthews et al. (2016) plate model.

Both the Signal Processing Toolbox™ and Wavelet Coherence Toolbox™ for MATLAB® were used in analysis and the production of figures. The Wavelet Coherence Toolbox™ can be found at [noc.ac.uk/marine-data-products/cross-wavelet-wavelet-coherence-toolbox-matlab](http://noc.ac.uk/marine-data-products/cross-wavelet-wavelet-coherence-toolbox-matlab), while the Signal Processing Toolbox™ can be found at [au.mathworks.com/help/signal/index.html](http://au.mathworks.com/help/signal/index.html).

10

Doss, S., Zahirovic, S., Müller, D. and Pall, J: DCO Modelling of Deep Time Atmospheric Carbon Flux from Subduction One Interactions: Plate Models & Minor Edits, Zenodo, <http://dx.doi.org/10.5281/zenodo.154001>, 2016.

15

## **Author Contribution**

Sebastiano Doss and Jodie Pall developed the Subduction Zone toolkit together and carried out modelling experiments under the supervision of Dietmar Müller and Sabin Zahirovic. Figures were prepared by Jodie Pall and Sebastiano Doss, and the toolkit repository was prepared by Sebastiano Doss. Jodie Pall conducted wavelet analysis with assistance from Rakib Hassan. Jodie Pall also prepared the manuscript with contributions from all co-authors.

## **Competing interests**

The authors declare that they have no conflict of interest.

## **Acknowledgements**

10 The authors acknowledge and thank the Deep Carbon Observatory (DCO) for funding this deep carbon modelling and visualisation effort. We would also like to thank members of the EarthByte Group for all their kind help as well as the University of Sydney for supporting open source research.

## **15 References**

- Algeo, T.J., Berner, R.A., Maynard, J.B. and Schekler, S.E.: Late Devonian oceanic anoxic events and biotic crises: “Rooted” in the evolution of vascular land plants?, *GSA Today*, 5, 64-66, 1995.
- Anagnostou, E., John, E. H., Edgar, K. M., Foster, G. L., Ridgwell, A., Inglis, G. N., Pancost, R.D., Lunt, D.J., Pearson, P. N.: Changing atmospheric CO<sub>2</sub> concentration was the primary driver of early Cenozoic climate, *Nature*, 533,7603, 380-384, 2016.
- Belcher, C. M., and Mander, L.: Catastrophe: Extraterrestrial impacts, massive volcanism, and the biosphere, in *The Future of the World’s Climate*, edited by A. Henderson-Sellers and K. McGruffie, 463–485, Elsevier, Amsterdam, 2012.
- Berner, R. A., and Caldeira, K.: The need for Mass balance and feedback in the geochemical carbon cycle, *Geology*, 25, 955-956, 1997.

- Berner, R. A., and Kothavala, Z.: GEOCARB III: a revised model of atmospheric CO<sub>2</sub> over Phanerozoic time, *American Journal of Science*, 301, 182-204, 2001.
- Berner, R. A.: *The Phanerozoic Carbon Cycle: CO<sub>2</sub> and O<sub>2</sub>*, Oxford University Press, 2004.
- Berner, R.A.: GEOCARBSULF: A combined model for Phanerozoic atmospheric O<sub>2</sub> and CO<sub>2</sub>,  
5 *Geochimica et Cosmochimica Acta*, 70, 23, 5653-5664, 2006.
- Boyden, J. A., Müller, R. D., Gurnis, M., Torsvik, T. H., Clark, J. A., Turner, M., Ivey-Law, H., Watson, R. J., and Cannon, J. S.: Next-generation plate-tectonic reconstructions using GPlates, *Geoinformatics: cyberinfrastructure for the solid earth sciences*, 9, 5-114, 2011.
- Burton, M. R., Sawyer, G. M., and Granieri, D.: Deep carbon emissions from volcanoes, *Rev. Mineral.*  
10 *Geochem*, 75, 323-354, 2013.
- Caballero, R., and Huber, M.: State-dependent climate sensitivity in past warm climates and its implications for future climate projections, *Proceedings of the National Academy of Sciences*, 110, 14162-14167, 2013.
- Cao, W., Lee, C-T. A., Lackey, J.S.: Episodic nature of continental arc activity since 750 Ma: A global  
15 compilation, *Earth and Planetary Science Letters*, 461, 85-95, 2016.
- Carter, L. B., and Dasgupta, R.: Hydrous basalt–limestone interaction at crustal conditions: Implications for generation of ultracalcic melts and outflux of CO<sub>2</sub> at volcanic arcs, *Earth and Planetary Science Letters*, 427, 202-214, 2015.
- Cohen, K., Finney, S., Gibbard, P., and Fan, J.-X.: The ICS international chronostratigraphic chart,  
20 *Episodes*, 36, 199-204, 2013.
- Domeier, M., and Torsvik, T. H.: Plate tectonics in the late Palaeozoic, *Geoscience Frontiers*, 5, 303-350, 2014.
- Doss, S., Zahirovic, S., Müller, D. and Pall, J.: DCO Modelling Of Deep Time Atmospheric Carbon Flux from Subduction Zone Interactions: Plate Models and Minor Edits,  
25 <http://doi.org/10.5281/zenodo.154001>, 2016.
- EarthByte Group: GPlates 1.5, Sydney, Australia <http://www.gplates.org/download.html>, 2015.
- ESRI: Release 10, Documentation Manual. Redlands, CA, Environmental Systems Research Institute, 2011.

- Fischer, T. P.: Fluxes of volatiles (H<sub>2</sub>O, CO<sub>2</sub>, N<sub>2</sub>, Cl, F) from arc volcanoes, *Geochemical Journal*, 42, 21-38, 2008.
- Golonka, J. and Kiessling, W.: Phanerozoic time scale and definition of time slices, in: *Phanerozoic Reef Patterns*, Kiessling, W., Flügel, E. and Golonka, J. (eds), SEPM (Society for Sedimentary Geology) Special Publication 72, 11-29, 2002.
- Grinsted, A., Moore, J. C., and Jevrejeva, S.: Application of the cross wavelet transform and wavelet coherence to geophysical time series, *Nonlinear processes in geophysics*, 11, 561-566, 2004.
- IPCC: *Climate Change 2013: The Physical Science Basis. Contribution of Working Group I to the Fifth Assessment Report of the Intergovernmental Panel on Climate Change*, Cambridge University Press, Cambridge, United Kingdom and New York, NY, USA, 1535 pp., 2013.
- Jagoutz, O., Macdonald, F. A., and Royden, L.: Low-latitude arc–continent collision as a driver for global cooling, *Proceedings of the National Academy of Sciences*, 113, 4935-4940, 2016.
- Johnston, F. K., Turchyn, A. V., and Edmonds, M.: Decarbonation efficiency in subduction zones: Implications for warm Cretaceous climates, *Earth and Planetary Science Letters*, 303, 143-152, 2011.
- Keleman, P., and Manning, C.: Reevaluating carbon fluxes in subduction zones, what goes down, mostly comes up. *PNAS* 112, E3997–E4006, 2015.
- Kent, D. V., and Muttoni, G.: Equatorial convergence of India and early Cenozoic climate trends, *Proceedings of the National Academy of Sciences*, 105, 16065-16070, 2008.
- Kent, D. V., and Muttoni, G.: Modulation of Late Cretaceous and Cenozoic climate by variable drawdown of atmospheric pCO<sub>2</sub> from weathering of basaltic provinces on continents drifting through the equatorial humid belt, *Climate of the Past*, 9, 525-546, 2013.
- Kerrick, D. M.: Present and past nonanthropogenic CO<sub>2</sub> degassing from the solid Earth, *Reviews of Geophysics*, 39, 565-585, 2001.
- Kerrick, D., and Connolly, J.: Metamorphic devolatilization of subducted oceanic metabasalts: implications for seismicity, arc Magmatism and volatile recycling, *Earth and Planetary Science Letters*, 189, 19-29, 2001.
- Kiessling, W., Flügel, E., and Golonka, J.: *Fluctuations in the carbonate production of Phanerozoic reefs*, Geological Society, London, Special Publications, 178, 191-215, 2000.

- Kiessling, W., Flügel, E., and Golonka, J.: Patterns of Phanerozoic carbonate platform sedimentation, *Lethaia*, 36, 195-225, 2003.
- Kump, L. R., Brantley, S. L., and Arthur, M. A.: Chemical weathering, atmospheric CO<sub>2</sub>, and climate, *Annual Review of Earth and Planetary Sciences*, 28, 611-667, 2000.
- 5 Lau, K., and Weng, H.: Climate signal detection using wavelet transform: How to make a time series sing, *Bulletin of the American Meteorological Society*, 76, 2391-2402, 1995.
- Lee, C. T. A., Lackey, J. S.: Global continental arc flare-ups and their relation to long-term greenhouse conditions, *Elements*, 11,2,125-130, 2015.
- Lee, C.-T. A., Shen, B., Slotnick, B. S., Liao, K., Dickens, G. R., Yokoyama, Y., Lenardic, A.,  
10 Dasgupta, R., Jellinek, M., and Lackey, J. S.: Continental arc–island arc fluctuations, growth of crustal carbonates, and long-term climate change, *Geosphere*, 9, 21-36, 2013.
- Lee, H., Muirhead, J. D., Fischer, T. P., Ebinger, C. J., Kattenhorn, S. A., Sharp, Z. D., and Kianji, G.: Massive and prolonged deep carbon emissions associated with continental rifting, *Nature Geoscience*, 2016.
- 15 Lenardic, A., Jellinek, A., Foley, B., O'Neill, C., and Moore, W.: Climate-tectonic coupling: Variations in the mean, variations about the mean, and variations in mode, *Journal of Geophysical Research: Planets*, 2016.
- Matthews, K. J., Maloney, K. T., Zahirovic, S., Williams, S. E., Seton, M., and Müller, R. D.: Global plate boundary evolution and kinematics since the late Palaeozoic, *Global and Planetary Change*, 146,  
20 226-250, <http://dx.doi.org/10.1016/j.gloplacha.2016.10.002>, 2016.
- McCourt, W., Crow, M., Cobbing, E., and Amin, T.: Mesozoic and Cenozoic plutonic evolution of SE Asia: evidence from Sumatra, Indonesia, *Geological Society, London, Special Publications*, 106,1, 321-335, 1996.
- McKenzie, N. R., Horton, B. K., Loomis, S. E., Stockli, D. F., Planavsky, N. J., and Lee, C. T.:  
25 Continental arc volcanism as the principal driver of icehouse-greenhouse variability, *Science (New York, N.Y.)*, 352, 444-447, [10.1126/science.aad5787](https://doi.org/10.1126/science.aad5787), 2016.

- Merdith, A.S., Collins, A.S., Williams, S.E., Pisarevsky, S., Foden, J.D., Archibald, D.B., Blades, M.L., Alessio, B.L., Armistead, S., Plavsa, D., Clark, C. and Muller, R.D.: A full-plate global reconstruction of Neoproterozoic, Gondwana research, 50, 84-134, 2017.
- Müller, R. D., Seton, M., Zahirovic, S., Williams, S. E., Matthews, K. J., Wright, N. M., Shephard, G. E., Maloney, K., Barnett-Moore, N., and Hosseinpour, M.: Ocean basin evolution and global-scale plate reorganization events since Pangea breakup, *Annual Review of Earth and Planetary Sciences*, 44, 107-138, 2016.
- Park, J., and Royer, D. L.: Geologic constraints on the glacial amplification of Phanerozoic climate sensitivity, *American Journal of Science*, 311, 1-26, 2011.
- 10 Prokoph, A., and El Bilali, H.: Cross-wavelet analysis: a tool for detection of relationships between palaeoclimate proxy records, *Mathematical geosciences*, 40, 575-586, 2008.
- Rea, D. K., and Ruff, L. J.: Composition and Mass flux of sediment entering the world's subduction zones: implications for global sediment budgets, great earthquakes, and volcanism, *Earth and Planetary Science Letters*, 140, 1-12, 1996.
- 15 Ridgwell, A., and Zeebe, R.: The role of the global carbonate cycle in the regulation and evolution of the Earth system, *Earth and Planetary Science Letters*, 234, 299-315, 10.1016/j.epsl.2005.03.006, 2005.
- Royer, D. L.: CO<sub>2</sub>-forced climate thresholds during the Phanerozoic, *Geochimica et Cosmochimica Acta*, 70, 5665-5675, 2006.
- Scotese, C. R.: PALAEOMAP PalaeoAtlas for GPlates and the PalaeoData Plotter Program, PALAEOMAP Project, <http://www.earthbyte.org/palaeomap-palaeoatlas-for-gplates>, 2016.
- 20 Siebert, L., and Simkin, T.: *Volcanoes of the world: An illustrated catalog of Holocene volcanoes and their eruptions*, 2014.
- Sundquist, E. T.: Steady- and non-steady-state carbonate-silicate controls on atmospheric CO<sub>2</sub>, *Quaternary Science Reviews*, 10, 283-296, [http://dx.doi.org/10.1016/0277-3791\(91\)90026-Q](http://dx.doi.org/10.1016/0277-3791(91)90026-Q), 1991.
- 25 Torrence, C., and Compo, G. P.: A practical guide to wavelet analysis, *Bulletin of the American Meteorological society*, 79, 61-78, 1998.

- van der Meer, D. G., Zeebe, R. E., van Hinsbergen, D. J., Sluijs, A., Spakman, W., and Torsvik, T. H.: Plate tectonic controls on atmospheric CO<sub>2</sub> levels since the Triassic, *Proceedings of the National Academy of Sciences*, 111, 4380-4385, 2014.
- Walker, J. C., Hays, P., and Kasting, J. F.: A negative feedback mechanism for the long-term  
5 stabilization of Earth's surface temperature, *Journal of Geophysical Research: Oceans*, 86, 9776-9782, 1981.
- Wessel, P., Smith, W.H.F., Scharroo, R., Luis, J.F. and Wobbe, F.: GMT 5.2.1., SOEST, Dept. of Geology & Geophysics, Honolulu, Hawaii, <http://gmt.soest.hawaii.edu/projects/gmt/wiki/Download>, 2015.
- 10 Whittaker, J.M., Müller, R.D., Sdrolias, M., and Heine, C.: Sunda-Java trench kinematics, slab window formation and overriding plate deformation since the Cretaceous, *Earth and Planetary Science Letters*, 255, 445-457, <http://dx.doi.org/10.1016/j.epsl.2006.12.031>, 2007.
- Winder, S.: *Analog and Digital Filter Design*, Elsevier Science, 2002.
- Zahirovic, S., Matthews, K. J., Flament, N., Müller, R. D., Hill, K. C., Seton, M., and Gurnis, M.:  
15 Tectonic evolution and deep mantle structure of the eastern Tethys since the latest Jurassic, *Earth Science Reviews*, 162, 293-337, 2016.
